# Supplementary material
Source: PubMed Central journal article supplement (PMC1464330)
Supplement: pnas_0600774103_9.pdf [file pnas_0600774103_9.pdf]

**Table 2. Assigned hyperfine shifted resonances in the  $^1\text{H}$  NMR spectra of Cu(II) AZAMI-F, AZAMI, AZ, and AMI**

| Peak | Assignment*                    | $\delta$ , ppm                                        |                                                     |                                                    |                                                 |                                                  |
|------|--------------------------------|-------------------------------------------------------|-----------------------------------------------------|----------------------------------------------------|-------------------------------------------------|--------------------------------------------------|
|      |                                | $\delta_{\text{obs}}$ Cu(II)<br>AZAMI-F <sup>†‡</sup> | $\delta_{\text{dia}}$ Cu(I)<br>AZAMI-F <sup>§</sup> | $\delta_{\text{obs}}$ Cu(II)<br>AZAMI <sup>†</sup> | $\delta_{\text{obs}}$ Cu(II)<br>AZ <sup>†</sup> | $\delta_{\text{obs}}$ Cu(II)<br>AMI <sup>¶</sup> |
| a    | His-46 C $^{\delta 2}$ H       | $\approx 45$ ( $\approx 43$ )                         | 7.75/6.15                                           | $\approx 46$                                       | $\approx 52$                                    | 43                                               |
| b    | His-115 C $^{\delta 2}$ H      |                                                       |                                                     |                                                    |                                                 | 50                                               |
| c/d  | His-46/115 C $^{\epsilon 1}$ H | $\approx 32$ ( $\approx 31$ )                         | 7.09                                                | $\approx 30$                                       | $\approx 30$ <sup>  </sup>                      | $\approx 35$                                     |
| e    | His-46 N $^{\epsilon 2}$ H     | 32.3**                                                |                                                     | 30.8**                                             | 26.9 <sup>††</sup>                              | 27.5                                             |
| f    | Met-117 C $^{\gamma 2}$ H      | $\approx 21$ ( $\approx 19.5$ )                       | 3.35                                                |                                                    |                                                 | 12/11.1                                          |
| g    | Asn-47 C $^{\alpha}$ H         | 17.8 (16.7)                                           | 4.81                                                | 17.5                                               | 19.0                                            | 14.1                                             |
| h    | Met-117 C $^{\gamma 1}$ H      | 11.6 (9.5)                                            |                                                     | $\approx 15$                                       |                                                 | 12/11.1                                          |
| i    | His-46 C $^{\beta 1}$ H        | -3 (-2.5)                                             |                                                     | -3                                                 | -2                                              | -2.5                                             |
| j    | Cys-112 C $^{\alpha}$ H        | -9 (-8)                                               |                                                     | $\approx -10$                                      | -7.8                                            | -9.5                                             |

\*In AZAMI, Met-118 is found in place of Met-117. In AZ, His-117 and Met-121 are found in place of His-115 and Met-117. In AMI, the residues for which hyperfine shifted signals are observed are His-54, Asn-55, Cys-93, His-96, and Met-99.

<sup>†</sup>Data recorded at 25°C in 10 mM phosphate (99.9% D<sub>2</sub>O), pH\* 8. The observed shifts ( $\delta_{\text{obs}}$ ) arise from the three contributing factors  $\delta_{\text{dia}}$ ,  $\delta_{\text{pc}}$ , and  $\delta_{\text{c}}$  { $\delta_{\text{dia}}$  is the shift in an analogous diamagnetic system [for example the Cu(I) protein],  $\delta_{\text{pc}}$  is the pseudocontact (through space) contribution, and  $\delta_{\text{c}}$  is the Fermi contact (through bond) contribution}. The  $\delta_{\text{pc}}$  values are not so significant, because the small anisotropy of the g tensor, and, therefore,  $\delta_{\text{obs}}$  minus  $\delta_{\text{dia}}$  for a particular proton provides a good estimate of  $\delta_{\text{c}}$ , which is a measure of the spin density.

<sup>‡</sup>The  $\delta_{\text{obs}}$  values in parenthesis are those obtained at 40°C, at which temperature the saturation transfer experiments were performed.

<sup>§</sup>Positions identified from saturation transfer difference experiments on 1:1 mixtures of Cu(II) and Cu(I) AZAMI-F at 40°C (see Fig. 9).

<sup>¶</sup>For *Paracoccus versutus* AMI in 50 mM phosphate at pH 7.0 and 32°C.

<sup>||</sup>The second His C $^{\epsilon 1}$ H resonance is found at 46.7 ppm at 800 MHz (5°C) in 10 mM phosphate, pH 8.0.

\*\*Observed in 10 mM phosphate (90% H<sub>2</sub>O/10% D<sub>2</sub>O) at pH 8.0 (25°C).

<sup>††</sup>Recorded at 800 MHz (5°C) in 10 mM phosphate (90% H<sub>2</sub>O/10% D<sub>2</sub>O) at pH 8.0.
