# Supplementary material
Source: PubMed Central journal article supplement (PMC1464330)

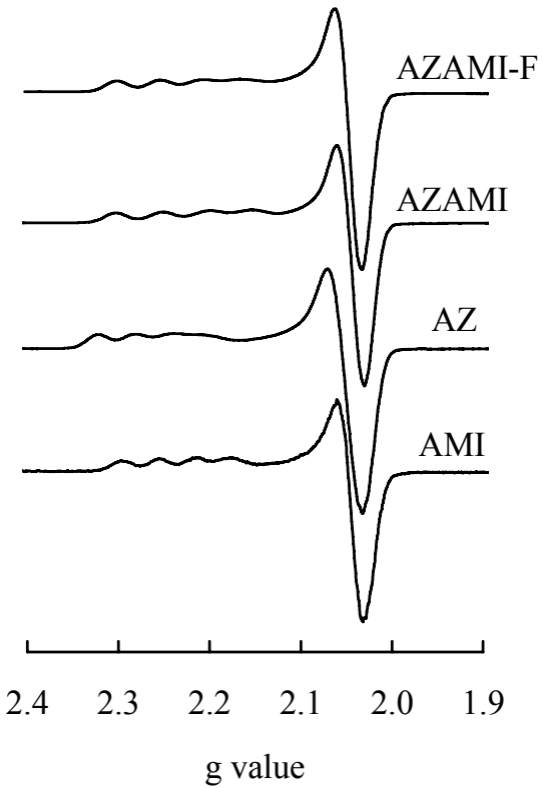

Supplement: pnas_0600774103_2.pdf [file pnas_0600774103_2.pdf]

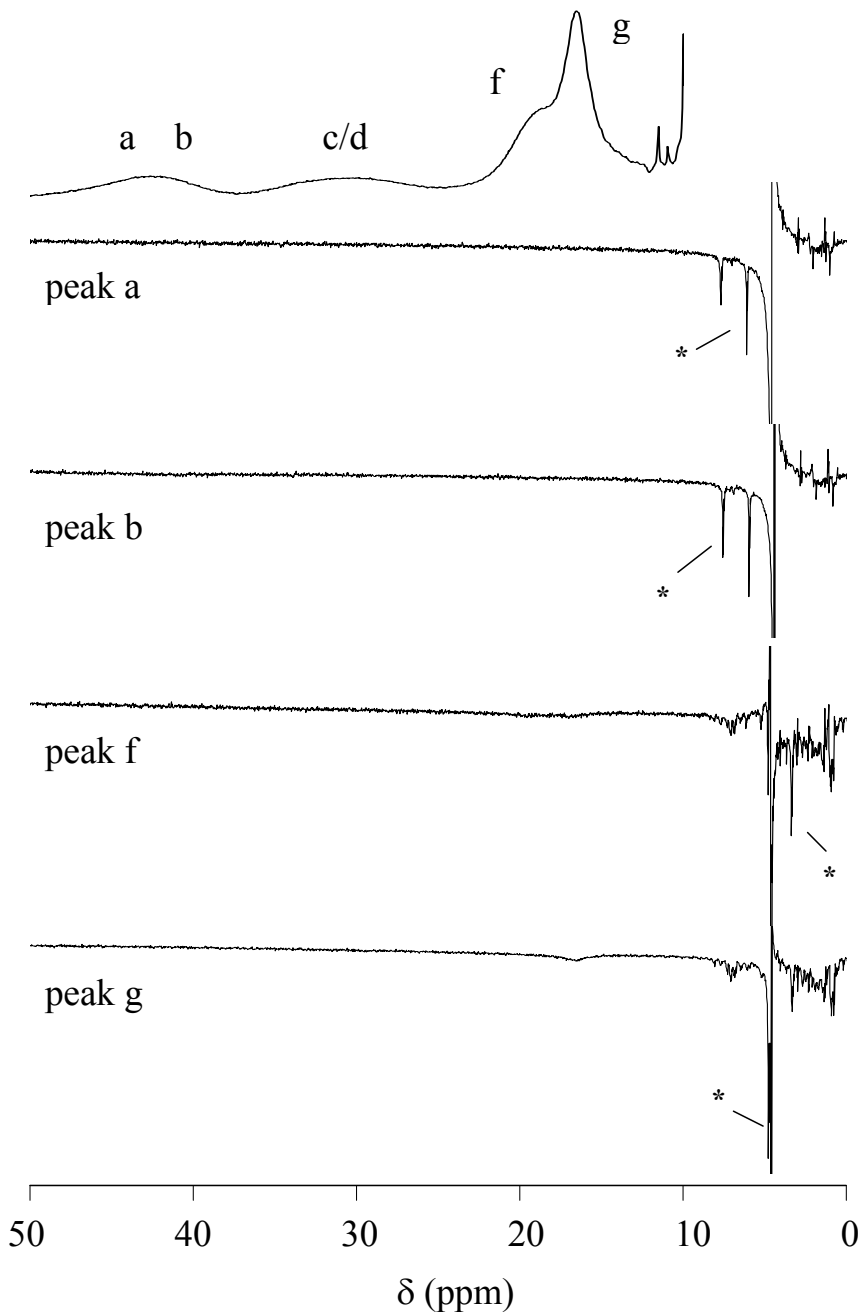

Supplement: pnas_0600774103_6.pdf [file pnas_0600774103_6.pdf]
